# Supplementary material for: Description of an Enterococcus faecium genotype vanB outbreak in a hospitalization ward
Source: Research Square preprint supplement (doi:10.21203/rs.3.rs-4028516/v1), 2024-03-12
Supplement: Supplementary file 1 [file 5c5f56770ea7637192475a36.docx]

**Table 1. Control measures adopted against the outbreak caused by vancomycin-resistant *Enterococcus faecium* in a surgery ward.**

Contact isolation and cohorting patients affected by the outbreak.

Avoidance of patient transfer from the ward affected by the outbreak to other wards.

Inclusion of the cases in an informatized registry for early detection and establishment of prevention measures in case of re-admission.

Elaboration of an action protocol against VRE and diffusion sessions for staff.

Observations on adherence to hand hygiene in the wards affected by the outbreak.

Insistence to the staff on hand hygiene and daily change of uniform.

Increase the concentration of the chlorinated cleaning product in the ward.

Increased cleaning frequency of the ward.

Carrier study with rectal sampling of all patients upon admission to the affected ward and then weekly during admission.

Carrier study of all patients transferred from the affected ward to other wards during the previous month.

Preventive isolation and carrier study for all patients admitted to the ICU.

Admission of the scheduled patients for intervention with insertion of prosthetic material to different wards from the outbreak.

Changes in the microbiological study routine of *E. faecium* to improve vancomycin resistance detection through molecular studies.
